# The DSM-5 Collection

## Diagnostic and Statistical Manual of Mental Disorders, Fifth Edition (DSM-5®)

American Psychiatric Association

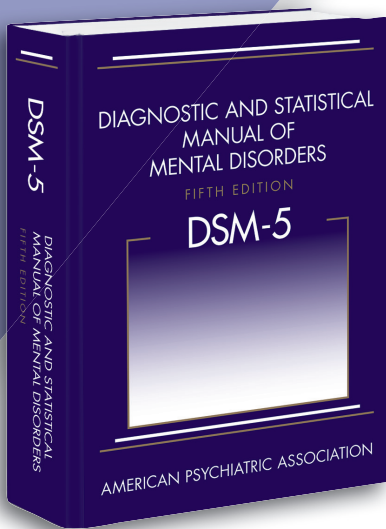

Includes ICD-10-CM codes

The *Diagnostic and Statistical Manual of Mental Disorders*, Fifth Edition, is the most comprehensive, current, and critical resource for clinical practice available to today's mental health professionals.

This edition of *Diagnostic and Statistical Manual of Mental Disorders* (DSM-5®), used by clinicians and researchers to diagnose and classify mental disorders, is the product of more than 10 years of effort by hundreds of international experts in all aspects of mental health. Their dedication and hard work have yielded an authoritative volume that defines and classifies mental disorders in order to improve diagnosis, treatment, and research.

The criteria are concise and explicit, intended to facilitate an objective assessment of symptom presentations in a variety of clinical settings—inpatient, outpatient, partial hospital, consultation-liaison, clinical, private practice, and primary care.

- The latest findings in neuroimaging and genetics have been integrated into each disorder along with gender and cultural considerations.
- The revised organizational structure recognizes symptoms that span multiple diagnostic categories, providing new clinical insights in diagnosis.
- Both ICD-9-CM and ICD-10-CM codes are included for each disorder.

2013 • 991 pages • ISBN 978-0-89042-554-1 • Hardcover • \$210.00 • Item #2554  
2013 • 991 pages • ISBN 978-0-89042-555-8 • Paperback • \$160.00 • Item #2555  
2013 • 991 pages • ISBN 978-0-89042-557-2 • eBook • \$128.00 • Item #2557

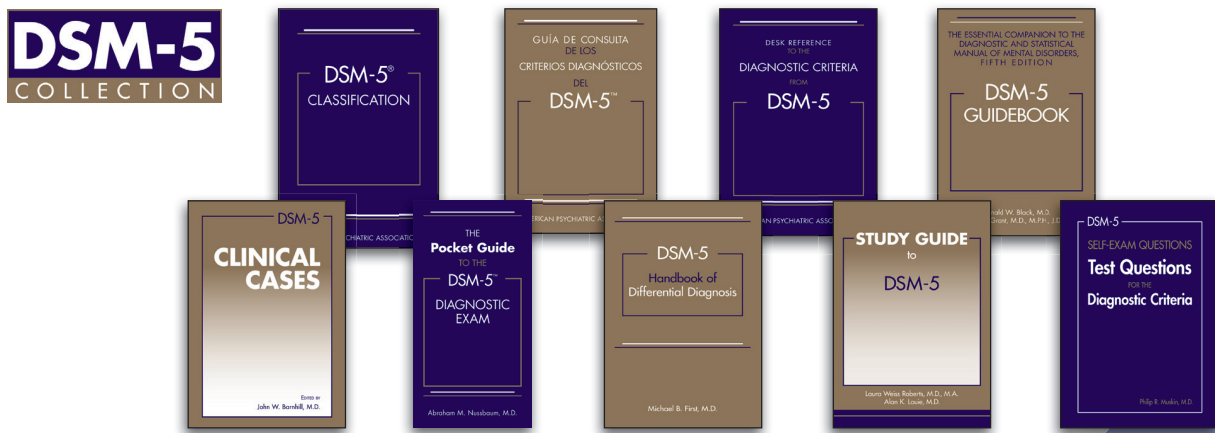

Source: https://focus.psychiatryonline.org/doi/suppl/10.1176/foc.2019.17.issue-4/suppl_file/front.pdf
