***The Newest Addition to APA Publishing's Portfolio of Journals***

# The American Journal of Psychotherapy

**psychotherapy.psychiatryonline.org**

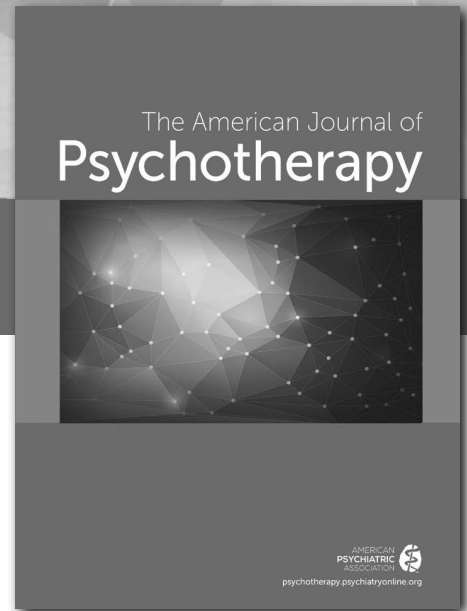

2018 • Vol. 71  
Frequency: Quarterly  
Online ISSN: 2575-6559  
psychotherapy.psychiatryonline.org

**Holly A. Swartz, M.D., Editor-in-Chief**

*The American Journal of Psychotherapy* is a peer-reviewed, interdisciplinary journal published quarterly by the American Psychiatric Association. Begun in 1947 by the Association for the Advancement of Psychotherapy, *The American Journal of Psychotherapy* provides a forum for advancing the theory, science, and clinical practice of psychotherapy, publishing articles that expand the understanding of psychotherapies, especially in the domains of efficacy, process, education, and practice.

The journal publishes empirical papers on psychotherapy outcomes, process, measurement, and education. Maintaining a strong clinical focus, it welcomes case reports, review articles, and training tools that will guide and shape clinical practice.

*The American Journal of Psychotherapy* invites a broad range of perspectives from all psychotherapy disciplines, including but not limited to psychodynamic, interpersonal, cognitive- or dialectical-behavioral, existential, emotion-focused, problem-solving, mentalizing, mindfulness-based, and client-centered approaches.

*The American Journal of Psychotherapy* inclusively addresses topics across treatment modalities, age groups, genders, races and ethnicities, and diagnoses. The journal serves the international community by curating a vibrant, pluralistic, dialogue about psychotherapy that ultimately will inform clinical care.

**Subscribe Now!** .....

**➤ Visit [appi.org](http://appi.org) for pricing and more information!**

**Statement of Ownership, Management, and Circulation**  
**(All Periodicals Publications Except Requester Publications)**

PS Form 3526

|                                                                                                                                                                                                                                                                                                                                                                                                                                                                                                                                                                                |                                                          |                                                  |                                     |
|--------------------------------------------------------------------------------------------------------------------------------------------------------------------------------------------------------------------------------------------------------------------------------------------------------------------------------------------------------------------------------------------------------------------------------------------------------------------------------------------------------------------------------------------------------------------------------|----------------------------------------------------------|--------------------------------------------------|-------------------------------------|
| <b>1. Publication Title</b><br>AMERICAN PSYCHIATRIC ASSOCIATION/<br>PSYCHIATRIC SERVICES                                                                                                                                                                                                                                                                                                                                                                                                                                                                                       | <b>2. Publication Number</b><br>251280                   | <b>ISSN</b><br>10752730                          | <b>3. Filing Date</b><br>09/20/2019 |
| <b>4. Issue Frequency</b><br>MONTHLY                                                                                                                                                                                                                                                                                                                                                                                                                                                                                                                                           | <b>5. Number of Issues Published Annually</b><br>12      | <b>6. Annual Subscription Price</b><br>\$ 169.00 |                                     |
| <b>7. Complete Mailing Address of Known Office of Publication</b><br>800 MAINE AVE, S.W., SUITE 900<br>WASHINGTON DC 20024-2812                                                                                                                                                                                                                                                                                                                                                                                                                                                |                                                          |                                                  | <b>Contact Person</b><br>BRIAN COLE |
|                                                                                                                                                                                                                                                                                                                                                                                                                                                                                                                                                                                |                                                          |                                                  | <b>Telephone</b><br>(202) 459-9750  |
| <b>8. Complete Mailing Address of Headquarters or General Business Office of Publisher</b><br>800 Maine Ave S.W., Suite 900<br>Washington, DC 20024-2812                                                                                                                                                                                                                                                                                                                                                                                                                       |                                                          |                                                  |                                     |
| <b>9. Full Names and Complete Mailing Addresses of Publisher, Editor, and Managing Editor</b>                                                                                                                                                                                                                                                                                                                                                                                                                                                                                  |                                                          |                                                  |                                     |
| <b>Publisher (Name and complete mailing address)</b><br>John McDuffie<br>800 Maine Ave S.W., Suite 900<br>Washington, DC 20024-2812                                                                                                                                                                                                                                                                                                                                                                                                                                            |                                                          |                                                  |                                     |
| <b>Editor (Name and complete mailing address)</b><br>Lisa B. Dixon, M.D., M.P.H.<br>800 Maine Ave S.W., Suite 900<br>Washington, DC 20024-2812                                                                                                                                                                                                                                                                                                                                                                                                                                 |                                                          |                                                  |                                     |
| <b>Managing Editor (Name and complete mailing address)</b><br>Demarie S. Jackson<br>800 Maine Ave S.W., Suite 900<br>Washington, DC 20024-2812                                                                                                                                                                                                                                                                                                                                                                                                                                 |                                                          |                                                  |                                     |
| <b>10. Owner (Do not leave blank. If the publication is owned by a corporation, give the name and address of the corporation immediately followed by the names and addresses of all stockholders owning or holding 1 percent or more of the total amount of stock. If not owned by a corporation, give names and addresses of the individual owners. If owned by a partnership or other unincorporated firm, give its name and address as well as those of each individual owner. If the publication is published by a nonprofit organization, give its name and address.)</b> |                                                          |                                                  |                                     |
| <b>Full Name</b>                                                                                                                                                                                                                                                                                                                                                                                                                                                                                                                                                               | <b>Complete Mailing Address</b>                          |                                                  |                                     |
| American Psychiatric Assoc.                                                                                                                                                                                                                                                                                                                                                                                                                                                                                                                                                    | 800 Maine Ave S.W., Suite 900, Washington, DC 20024-2812 |                                                  |                                     |
| .                                                                                                                                                                                                                                                                                                                                                                                                                                                                                                                                                                              |                                                          |                                                  |                                     |
| <b>11. Known Bondholders, Mortgagees, and Other Security Holders Owning or Holding 1 Percent or More of Total Amount of Bonds, Mortgages, or Other Securities. If none, check box</b> <input checked="" type="checkbox"/> None                                                                                                                                                                                                                                                                                                                                                 |                                                          |                                                  |                                     |
| <b>Full Name</b>                                                                                                                                                                                                                                                                                                                                                                                                                                                                                                                                                               | <b>Complete Mailing Address</b>                          |                                                  |                                     |
|                                                                                                                                                                                                                                                                                                                                                                                                                                                                                                                                                                                |                                                          |                                                  |                                     |
|                                                                                                                                                                                                                                                                                                                                                                                                                                                                                                                                                                                |                                                          |                                                  |                                     |
|                                                                                                                                                                                                                                                                                                                                                                                                                                                                                                                                                                                |                                                          |                                                  |                                     |

PS Form 3526, September 2007 (Page 1)

PRIVACY NOTICE: See our privacy policy on www.usps.com

|                                                                                                                                                                                                                                                                                                                                                        |                                                                                                                                                                    |                                                                 |                                                                    |
|--------------------------------------------------------------------------------------------------------------------------------------------------------------------------------------------------------------------------------------------------------------------------------------------------------------------------------------------------------|--------------------------------------------------------------------------------------------------------------------------------------------------------------------|-----------------------------------------------------------------|--------------------------------------------------------------------|
| <b>13. Publication Title</b><br>AMERICAN PSYCHIATRIC ASSOCIATION/PSYCHIATRIC SERVICES                                                                                                                                                                                                                                                                  |                                                                                                                                                                    | <b>14. Issue Date for Circulation Data Below</b><br>09/01/2019  |                                                                    |
| <b>15. Extend and Nature of Circulation</b>                                                                                                                                                                                                                                                                                                            |                                                                                                                                                                    | <b>Average No. Copies Each Issue During Preceding 12 Months</b> | <b>No. Copies of Single Issue Published Nearest to Filing Date</b> |
| <b>a. Total Numbers of Copies (Net press run)</b>                                                                                                                                                                                                                                                                                                      |                                                                                                                                                                    | 514                                                             | 450                                                                |
| <b>b. Paid Circulation (By Mail and Outside the Mail)</b>                                                                                                                                                                                                                                                                                              | (1) Mailed Outside County Paid Subscriptions Stated on PS Form 3541 (include paid distribution above nominal rate, advertiser's proof copies, and exchange copies) | 230                                                             | 224                                                                |
|                                                                                                                                                                                                                                                                                                                                                        | (2) Mailed In-County Paid Subscriptions Stated on PS Form 3541 (include paid distribution above nominal rate, advertiser's proof copies, and exchange copies)      | 0                                                               | 0                                                                  |
|                                                                                                                                                                                                                                                                                                                                                        | (3) Paid Distribution Outside the Mails Including Sales Through Dealers and Carriers, Street Vendors, Counter Sales, and Other Paid Distribution Outside USPS      | 54                                                              | 42                                                                 |
|                                                                                                                                                                                                                                                                                                                                                        | (4) Paid Distribution by Other Classes of Mail Through the USPS (e.g. First-Class Mail)                                                                            | 0                                                               | 0                                                                  |
| <b>c. Total Paid Distribution (Sum of 15b (1), (2), (3), (4))</b>                                                                                                                                                                                                                                                                                      |                                                                                                                                                                    | 284                                                             | 266                                                                |
| <b>d. Free or Nominal Rate Distribution (By Mail and Outside the Mail)</b>                                                                                                                                                                                                                                                                             | (1) Free or Nominal Rate Outside County Copies included on PS Form 3541                                                                                            | 50                                                              | 34                                                                 |
|                                                                                                                                                                                                                                                                                                                                                        | (2) Free or Nominal Rate In-County Copies included on PS Form 3541                                                                                                 | 0                                                               | 0                                                                  |
|                                                                                                                                                                                                                                                                                                                                                        | (3) Free or Nominal Rate Copies Mailed at Other Classes Through the USPS (e.g. First-Class Mail)                                                                   | 0                                                               | 0                                                                  |
|                                                                                                                                                                                                                                                                                                                                                        | (4) Free or Nominal Rate Distribution Outside the Mail (Carriers or other means)                                                                                   | 54                                                              | 42                                                                 |
| <b>e. Total Free or Nominal Rate Distribution (Sum of 15d (1), (2), (3), (4))</b>                                                                                                                                                                                                                                                                      |                                                                                                                                                                    | 104                                                             | 76                                                                 |
| <b>f. Total Distribution (Sum of 15c and 15e)</b>                                                                                                                                                                                                                                                                                                      |                                                                                                                                                                    | 388                                                             | 342                                                                |
| <b>g. Copies not Distributed</b>                                                                                                                                                                                                                                                                                                                       |                                                                                                                                                                    | 0                                                               | 0                                                                  |
| <b>h. Total (Sum of 15f and 15g)</b>                                                                                                                                                                                                                                                                                                                   |                                                                                                                                                                    | 388                                                             | 342                                                                |
| <b>i. Percent Paid ((15c / 15f) times 100)</b>                                                                                                                                                                                                                                                                                                         |                                                                                                                                                                    | 73.20 %                                                         | 77.78 %                                                            |
| <b>16. If total circulation includes electronic copies, report that circulation on lines below.</b>                                                                                                                                                                                                                                                    |                                                                                                                                                                    |                                                                 |                                                                    |
| <b>a. Paid Electronic Copies</b>                                                                                                                                                                                                                                                                                                                       |                                                                                                                                                                    | 0                                                               | 0                                                                  |
| <b>b. Total Paid Print Copies (Line 15c) + Paid Electronic Copies</b>                                                                                                                                                                                                                                                                                  |                                                                                                                                                                    | 0                                                               | 0                                                                  |
| <b>c. Total Print Distribution (Line 15f) + Paid Electronic Copies</b>                                                                                                                                                                                                                                                                                 |                                                                                                                                                                    | 0                                                               | 0                                                                  |
| <b>d. Percent Paid (Both Print and Electronic Copies)</b>                                                                                                                                                                                                                                                                                              |                                                                                                                                                                    | 0.00 %                                                          | 0.00 %                                                             |
| <input type="checkbox"/> I certify that 50% of all my distributed copies (Electronic and Print) are paid above a nominal price.                                                                                                                                                                                                                        |                                                                                                                                                                    |                                                                 |                                                                    |
| <b>17. Publication of Statement of Ownership</b>                                                                                                                                                                                                                                                                                                       |                                                                                                                                                                    |                                                                 |                                                                    |
| <input checked="" type="checkbox"/> If the publication is a general publication, publication of this statement is required. Will be printed in the 11/01/2019 issue of this publication. <input type="checkbox"/> Publication not required.                                                                                                            |                                                                                                                                                                    |                                                                 |                                                                    |
| <b>18. Signature and Title of Editor, Publisher, Business Manager, or Owner</b>                                                                                                                                                                                                                                                                        |                                                                                                                                                                    | <b>Title</b>                                                    | <b>Date</b>                                                        |
| Debra Eubanks                                                                                                                                                                                                                                                                                                                                          |                                                                                                                                                                    | Director, Publishing Business Operations                        | 09/20/2019 13:20:14 PM                                             |
| I certify that all information furnished on this form is true and complete. I understand that anyone who furnishes false or misleading information on this form or who omits material or information requested on the form may be subject to criminal sanctions (including fines and imprisonment) and/or civil sanctions (including civil penalties). |                                                                                                                                                                    |                                                                 |                                                                    |

PS Form 3526, September 2007 (Page 2)

PRIVACY NOTICE: See our privacy policy on www.usps.com

# EDITOR'S CHOICE

## Psychiatric Services

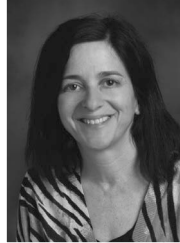

Lisa B. Dixon, M.D., M.P.H.

Collections curated by Lisa B. Dixon, M.D., M.P.H., and the Early-Career Psychiatrist Advisory Committee

Each collection will focus on one topic—summarizing for the researcher, clinician, and policy analyst the latest information and seminal research available from *Psychiatric Services*.

- Criminal justice
- Early psychosis intervention
- Substance use disorders
- Mental health disparities, by race-ethnicity
- Homelessness

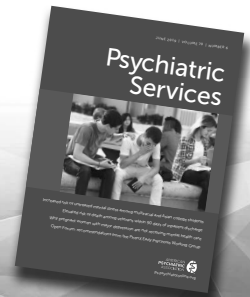

Sign up for Editor's Choice alert at <http://appi.org/etocs>.

Visit [ps.psychiatryonline.org/editorschoice](http://ps.psychiatryonline.org/editorschoice)

AMERICAN PSYCHIATRIC ASSOCIATION PUBLISHING

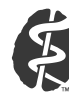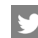

Follow @APAPubPsychSvcs

[appi.org](http://appi.org) • Email: [appi@psych.org](mailto:appi@psych.org) • Toll-Free: 1-800-368-5777

AH1927A



Searching for  
the perfect  
psychiatric career?

## Let APA JobCentral help!

### MANAGE YOUR CAREER

- Browse hundreds of active job listings!
- Create an account to save jobs, store multiple resumes and cover letters and communicate with employers through our internal messaging system.
- Set up multiple job alerts specifying your skills, interests and location to receive e-mails when employers post jobs that match your criteria.

### RECRUIT FOR OPEN POSITIONS

- Post your job in front of thousands of highly qualified psychiatrists.
- Cross promote your job listing in Psychiatric News.
- Search the anonymous resume database to find your ideal candidate.

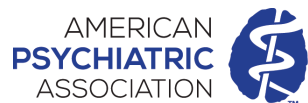

**JOBCENTRAL**  
The Career Hub for Psychiatry

[jobs.psychiatry.org](https://jobs.psychiatry.org)
