FALL 2019 | VOLUME 17 | NUMBER 4

# Focus

The Journal of Lifelong Learning in Psychiatry

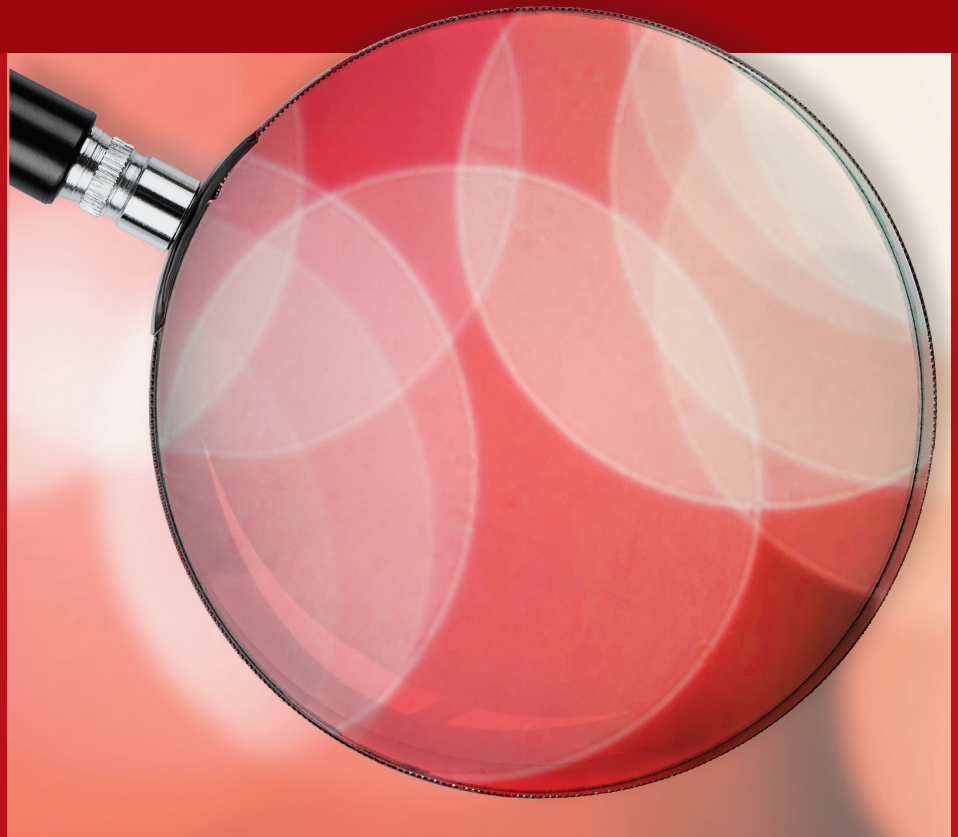

## Forensic Psychiatry: Focus on Malpractice and Risk Management

Guest Editor: Peter Ash, M.D.

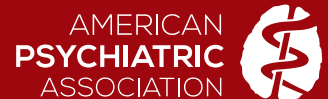

[focus.psychiatryonline.org](http://focus.psychiatryonline.org)
